# Supplementary material
Source: PubMed Central journal article supplement (PMC10776342)
Supplement: ajsc0012-0098-f7.pdf [file ajsc0012-0098-f7.pdf]

## Supplementary File 1

**Search strategy:**

((((((((((Adipose Derived Stromal Vascular Fraction[Title/Abstract] OR (Stromal Vascular Fraction[Title/Abstract])) OR (Adipose Derived Stem Cells[Title/Abstract])) OR (Fat stem cells[Title/Abstract])) OR (Mesenchymal stem cell\*[Title/Abstract])) OR (SVF[Title/Abstract])) OR (Adipose Derived Mesenchymal stem cells[Title/Abstract])) OR (Adipose Tissue Derived Stromal cell\*[Title/Abstract])) OR (AdiposeDerived Mesenchymal Stromal Cell[Title/Abstract])) OR (Adult stem cell\*[Title/Abstract])) OR (Stromal cells[Title/Abstract])) AND (((((((Scar[Title/Abstract] OR (Scars[Title/Abstract])) OR (hypertrophic scar\* [Title/Abstract])) OR (hypertrophic scar[Title/Abstract])) OR (keloids[Title/Abstract])) OR (cicatrix[Title/Abstract])) OR (contracture[Title/Abstract]))
